# Supplementary material
Source: PubMed Central journal article supplement (PMC6442727)
Supplement: NIHMS1017153-supplement-Supporting_information.pdf [file NIHMS1017153-supplement-Supporting_information.pdf]

## ***Supporting Information***

### **Fluorinated DNA Micelles: Synthesis and Properties**

Jianmei Zou<sup>‡,1</sup>, Cheng Jin<sup>‡,1</sup>, Ruowen Wang<sup>‡,||</sup>, Hailan Kuai<sup>‡</sup>, Lili Zhang<sup>‡</sup>, Xiaobing

Zhang<sup>‡</sup>, Juan Li<sup>‡,||†</sup>, Liping Qiu<sup>\*,‡,†</sup>, Weihong Tan<sup>\*,‡,†</sup>

<sup>‡</sup>Molecular Science and Biomedicine Laboratory, State Key Laboratory of Chemo/Biosensing and Chemometrics, College of Chemistry and Chemical Engineering, College of Life sciences, Aptamer Engineering Center of Hunan Province, Hunan University, Changsha, Hunan, 410082, China

<sup>||</sup>Institute of Molecular Medicine, Renji Hospital, Shanghai Jiao Tong University School of Medicine, Shanghai Jiao Tong University, College of Chemistry and Chemical Engineering, Shanghai, 200240, People's Republic of China

*&MOE Key Laboratory for Analytical Science of Food Safety and Biology, College of Chemistry, Fuzhou University, Fuzhou 350116, P. R. China*

<sup>†</sup>Department of Chemistry and Department of Physiology and Functional Genomics, Center for Research at the Bio/Nano Interface, UF Health Cancer Center, UF Genetics Institute, McKnight Brain Institute, University of Florida, Gainesville, FL 32611-7200, USA

\* To whom correspondence should be addressed.

<sup>†</sup> Co-first authors.

E-mail: qiuliping\_0615@163.com, tan@chem.ufl.edu

Tel: +86-731-88821894

## Table of Content

|                                                                                                  |     |
|--------------------------------------------------------------------------------------------------|-----|
| Experimental section .....                                                                       | S-3 |
| Figure S1. <sup>1</sup> H NMR spectrum of synthesized compound 1.....                            | S-3 |
| Figure S1. <sup>19</sup> F NMR spectrum of synthesized compound 1.....                           | S-4 |
| Figure S1. <sup>1</sup> H NMR spectrum of synthesized compound 2.....                            | S-4 |
| Figure S1. <sup>19</sup> F NMR spectrum of synthesized compound 2.....                           | S-5 |
| Figure S1. <sup>31</sup> P NMR spectrum of synthesized compound 1.....                           | S-5 |
| Figure S6. High-performance liquid chromatography profile of PF-T <sub>15</sub> -TAMRA<br>.....  | S-6 |
| Figure S7. ESI-MS analysis of PF-T <sub>15</sub> -TAMRA .....                                    | S-6 |
| Figure S8. Dynamic light scattering data .....                                                   | S-7 |
| Figure S9. Comparison of target binding affinity between PFDM and free DNA<br>.....              | S-7 |
| Figure S10. Cell viability of compound 2 and PFDM.....                                           | S-7 |
| Table S1. DNA sequences designed in this work .....                                              | S-8 |
| Table S2. The elution program for HPLC purification of lipid-conjugated<br>oligonucleotides..... | S-8 |

## Experimental section

**Materials.** 4,4,5,5,6,6,7,7,8,8,9,9,10,10,11,11,11 Heptadecafluorodecyl iodide and 2-cyanoethyl-N, N-diisopropylchlorophosphoramidite were purchased from Sigma. N,N-Diisopropylethylamine (DIPEA), 4-aminophenol, Dimethylformamide (DMF), Ethyl acetate (EtOAc), hexanes, Na<sub>2</sub>SO<sub>4</sub>, NaHCO<sub>3</sub>, doxorubicin (DOX) and other chemical reagents were obtained from commercial suppliers. 3-(4,5-dimethylthiazol-2-yl)-5-(3-carboxymethoxyphenyl)-2-(4-sulfophenyl)-2H-tetrazolium (MTS) was purchased from Promega. Ultrapure Milli-Q water (Millipore) was used throughout the experiments.

**Synthesis of compound 1.** 4,4,5,5,6,6,7,7,8,8,9,9,10,10,11,11,11 Heptadecafluorodecyl iodide (1 g, 1.7 mmol), DIPEA (0.22 g, 1.7 mmol) and 4-aminophenol (0.083 g, 0.77 mmol) were mixed in anhydrous DMF solution (5 mL) under nitrogen gas protection and stirred in reflux at 120 °C overnight. Upon cooling to room temperature, the reaction mixture was poured into 50 mL of water and then extracted 3 times with 100 mL EtOAc. The collected organic compound was dried over anhydrous Na<sub>2</sub>SO<sub>4</sub> and concentrated under low pressure. After purification by flash chromatographic column (hexanes to 20/80 EtOAc/hexanes), compound 1 of ~0.5g was obtained and identified by <sup>1</sup>H NMR (300 MHz, CDCl<sub>3</sub>) δ 7.87 (s, 1H), 6.85 (d, 2H), 6.76 (d, 2H), 3.28 (t, 4H), 2.33 (m, 4H), 1.80 (m, 4H) and <sup>19</sup>F NMR (300 MHz, CDCl<sub>3</sub>) δ -82.30 (t, 6F), -115.17 (s, 4F), -122.65-123.2 (m, 12F), -123.91 (s, 4F), -124.74 (s, 4F), -127.42(s, 4F).

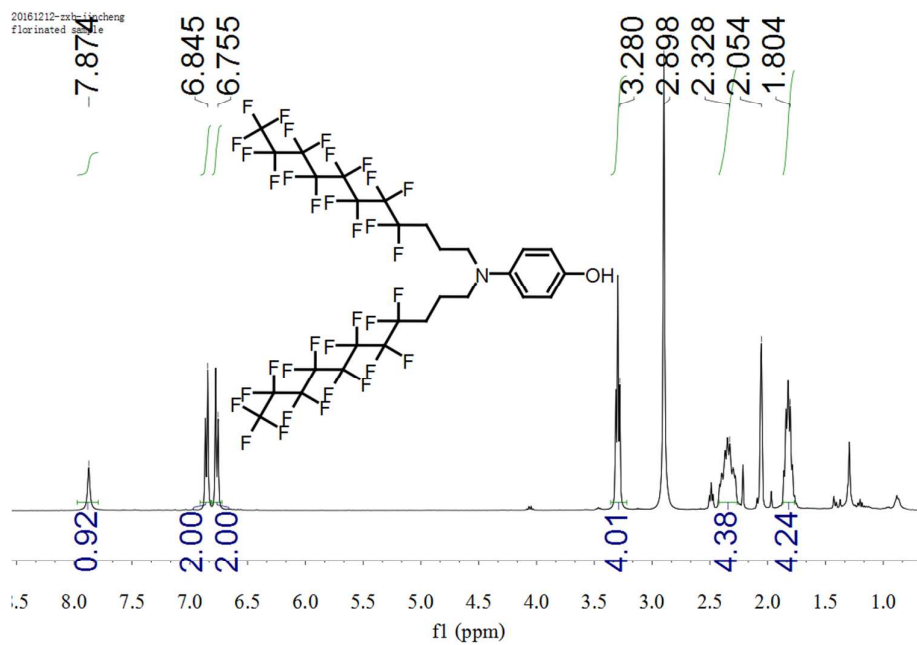

**Figure S1.**  $^1\text{H}$  NMR spectrum of compound 1.

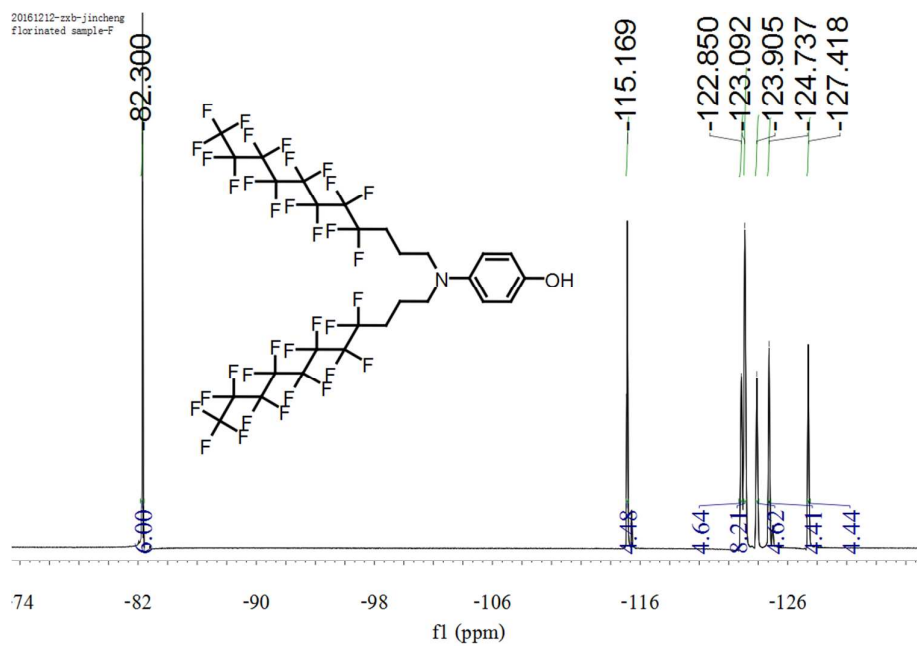

**Figure S2.**  $^{19}\text{F}$  NMR spectrum of compound 1.



20170412-zjm-20170412-h

pf-p

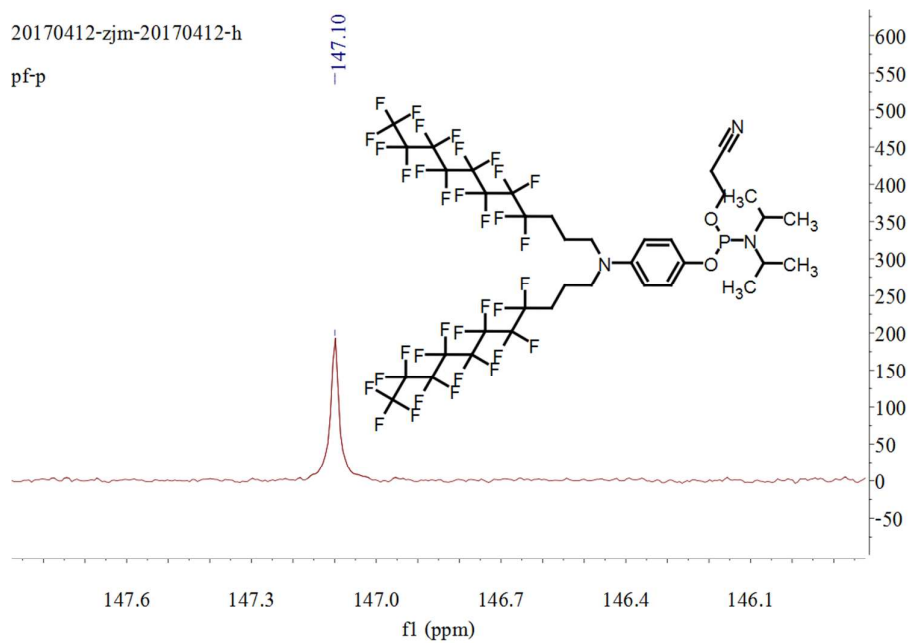

**Figure S5.**  $^{31}\text{P}$  NMR spectrum of compound 2.

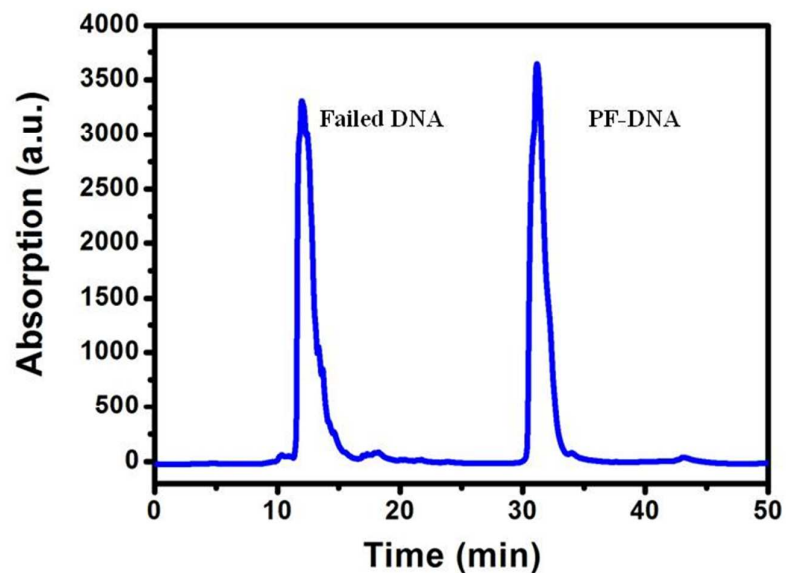

**Figure S6.** High-performance liquid chromatography (HPLC) profile of PF-T<sub>15</sub>-TAMRA. The retention time of ~32 min represents PF-T<sub>15</sub>-TAMRA, and the retention time of ~12 min represents unconjugated DNA fragments.

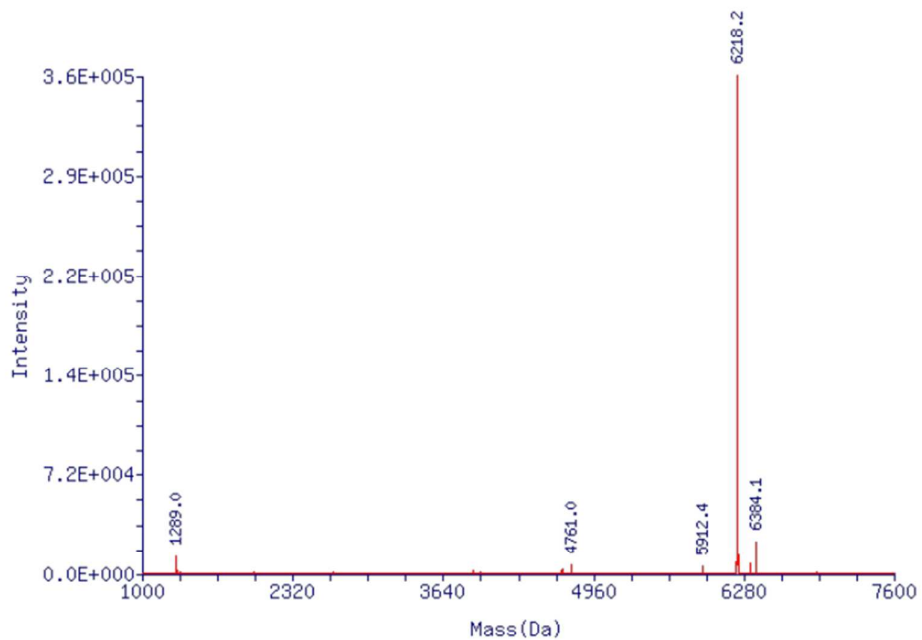

**Figure S7.** ESI-MS analysis of the diperfluorodecyl-DNA conjugates (PF-DNA) with the sequence of PF-TTT TTT TTT TTT-TAMRA. The calculated molecular weight of the PF-DNA and the DNA fragment was 6215.9 g/mol and 6218.2 g/mol, respectively.

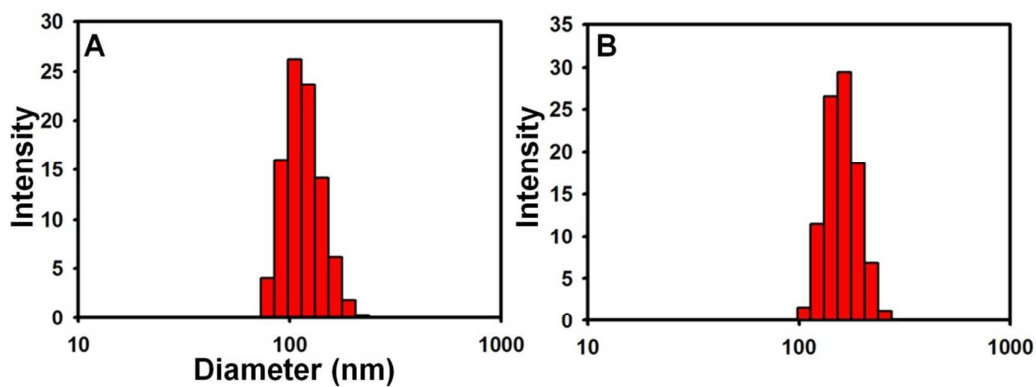

**Figure S8.** Dynamic light scattering (DLS) data of 2  $\mu\text{M}$  PF-T<sub>30</sub> (A) and 2  $\mu\text{M}$  PF-T<sub>45</sub> (B) in DPBS plus 5 mM  $\text{Mg}^{2+}$ .

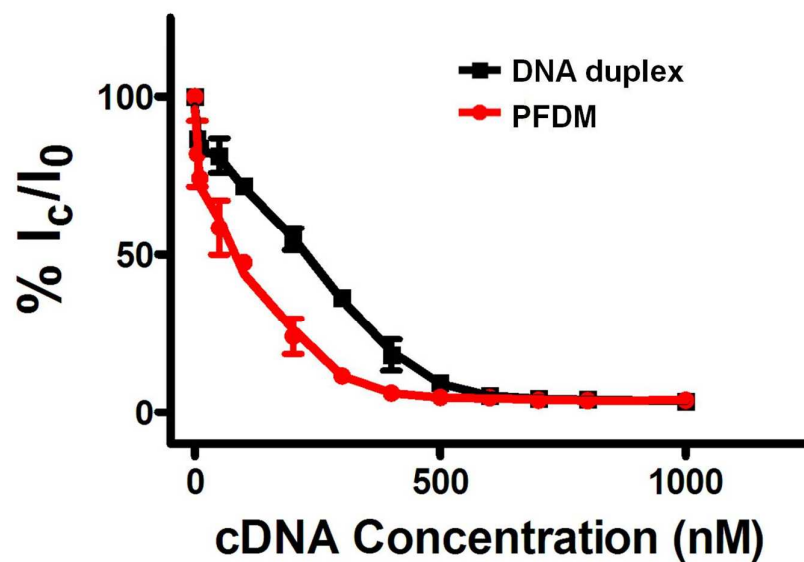

**Figure S9.** Comparison of target binding affinity between PF-DNA micelles (PFDM) and free DNA. Fluorescence intensity of FAM-labelled PFDM and FAM-labelled DNA with addition of Dabcyl-labelled cDNA at different concentrations.

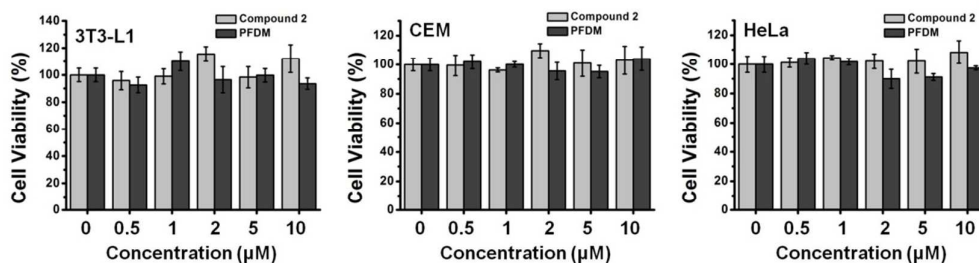

**Figure S10.** Cytotoxicity of compound 2 and PF-DNA conjugate. Cells (3T3-L1, CEM and HeLa) were incubated with compound 2 or PF-DNA conjugate of different concentrations at 37 °C for 48 h, and the cell viability was tested with a MTS assay.



**Table S1.** DNA sequences designed in this work.

| <b>Name</b>                    | <b>Sequences (from 5' to 3')</b>                      |
|--------------------------------|-------------------------------------------------------|
| <b>PF-py-T<sub>15</sub></b>    | PF-py-TTT TTT TTT TTT TTT                             |
| <b>PF-py-T<sub>30</sub></b>    | PF-py-TTT TTT TTT TTT TTT TTT TTT TTT TTT TTT         |
| <b>PF-py-T<sub>45</sub></b>    | PF-py-TTT TTT |
| <b>py-T<sub>15</sub></b>       | py-TTT TTT TTT TTT TTT                                |
| <b>PF-DNA-FAM</b>              | PF-TTT CCC AGC CCT C-FAM                              |
| <b>DNA-FAM</b>                 | CCC AGC CCT C-FAM                                     |
| <b>cDNA-Dabcyl</b>             | Dabcyl-GAG GGC TGG G                                  |
| <b>PF-T<sub>15</sub></b>       | PF- TTT TTT TTT TTT TTT                               |
| <b>T<sub>15</sub></b>          | TTT TTT TTT TTT TTT                                   |
| <b>PF-T<sub>15</sub>-TAMRA</b> | PF- TTT TTT TTT TTT TTT-TAMRA                         |
| <b>T<sub>15</sub>-TAMRA</b>    | TTT TTT TTT TTT TTT-TAMRA                             |
| <b>cDNA-BHQ</b>                | BHQ-AAA AAA AAA AAA AAA                               |

Notes: PF indicates diperfluorodecyl chain modification; py indicates pyrene molecule.

**Table S2.** HPLC purification of lipid-conjugated oligonucleotides according to this elution program.

| <b>Time/min</b> | <b>A (0.1M TEAA)</b> | <b>B (acetonitrile)</b> |
|-----------------|----------------------|-------------------------|
| <b>0</b>        | <b>95%</b>           | <b>5%</b>               |
| <b>4</b>        | <b>95%</b>           | <b>5%</b>               |
| <b>4.01</b>     | <b>90%</b>           | <b>10%</b>              |
| <b>40</b>       | <b>10%</b>           | <b>90%</b>              |
| <b>50</b>       | <b>10%</b>           | <b>90%</b>              |
